# Supplementary material for: Scientific Investigation of Contemporary Pastel Painting by Roberto Sebastian Matta: Characterization of Original Materials through Multispectral Imaging and Spectroscopic Techniques
Source: MDPI journal article supplement (doi:10.3390/heritage6030134), 2023-02-28
Supplement: s1 [file s1]

Archive with 1 entries (1 files):
- heritage-2221382-supplementary.pdf
