# Supplementary material for: Scientific Investigation of Contemporary Pastel Painting by Roberto Sebastian Matta: Characterization of Original Materials through Multispectral Imaging and Spectroscopic Techniques
Source: MDPI journal article supplement (doi:10.3390/heritage6030134), 2023-02-28
Supplement: s1 [file s1 › heritage-2221382-supplementary.pdf]

## Supplementary Materials for the paper:

### Scientific investigation of contemporary pastel painting by Roberto Sebastian Matta: characterization of original materials through multispectral imaging and spectroscopic techniques

**Authors:** Claudia Colantonio, Claudia Pelosi, Giuseppe Calabrò, Valeria Spizzichino, Ilaria Partenzi, Luca Lanteri

In this document are reported the results of elemental analysis done with SEM-EDS, discussed in section 3.5 of the manuscript. EDS analyses are reported for both painting layer and paper support.

004

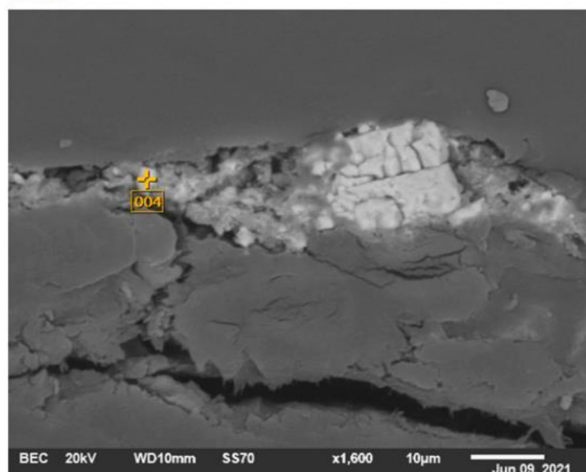

Volt : 20.00 kV  
Mag. : x 1,600  
Date : 2021/06/09  
Pixel : 640 x 480

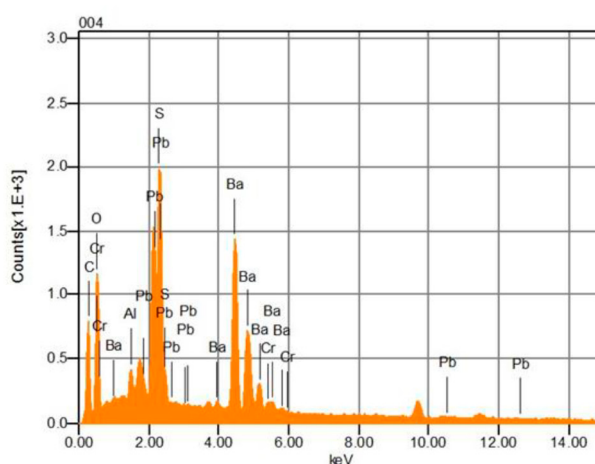

Acquisition Condition  
Instrument : 6010LA  
Volt : 20.00 kV  
Current : ---  
Process Time : T4  
Live time : 60.00 sec.  
Real Time : 63.38 sec.  
DeadTime : 6.00 %  
Count Rate : 3490.00 CPS

| Chemical formula | ms%    | mol%   | Sigma | Net    | K ratio   | Line |
|------------------|--------|--------|-------|--------|-----------|------|
| C                | 24.29  | 57.62  | 0.17  | 17913  | 0.0073437 | K    |
| O                | 14.27  | 25.41  | 0.21  | 27344  | 0.0380702 | K    |
| Al               | 1.17   | 1.23   | 0.15  | 8043   | 0.0035938 | K    |
| S                | 5.87   | 5.22   | 0.11  | 53987  | 0.0325866 | K    |
| Cr               | 0.98   | 0.54   | 0.35  | 4305   | 0.0057260 | K    |
| Ba               | 37.85  | 7.85   | 0.58  | 142560 | 0.2152721 | L    |
| Pb               | 15.58  | 2.14   | 0.55  | 63011  | 0.0719844 | M    |
| Total            | 100.00 | 100.00 |       |        |           |      |

**Figure S1.** Point 004 of analysis (painting layer in the Figure 13) with the chemical elements found. Magnification 1600x

005

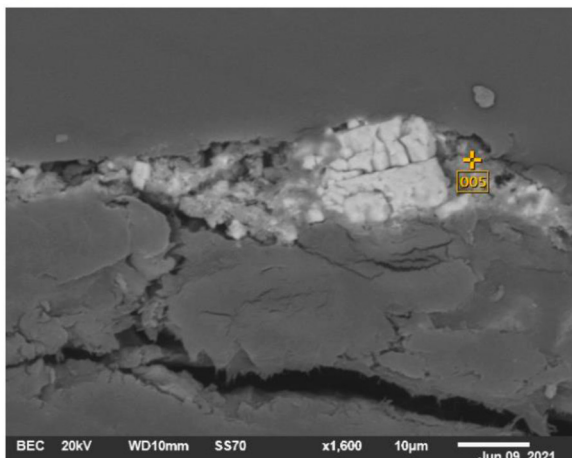

Volt : 20.00 kV  
Mag. : x 1,600  
Date : 2021/06/09  
Pixel : 640 x 480

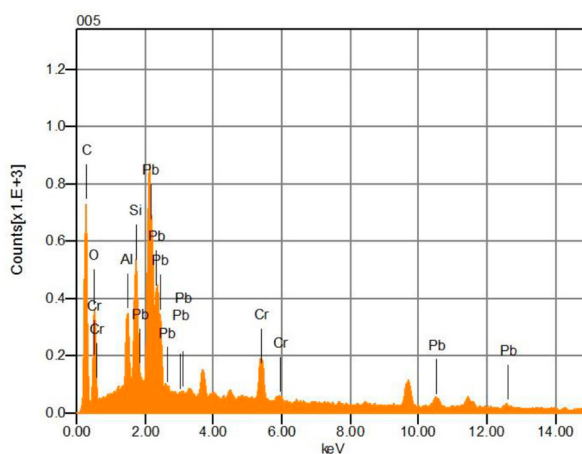

Acquisition Condition  
Instrument : 6010LA  
Volt : 20.00 kV  
Current : ---  
Process Time : T4  
Live time : 60.00 sec.  
Real Time : 61.42 sec.  
DeadTime : 2.00 %  
Count Rate : 1387.00 CPS

| Chemical formula | ms%    | mol%   | Sigma | Net   | K ratio   | Line |
|------------------|--------|--------|-------|-------|-----------|------|
| C                | 51.82  | 72.93  | 0.20  | 17548 | 0.0071939 | K    |
| O                | 18.69  | 19.75  | 0.50  | 8286  | 0.0115367 | K    |
| Al               | 2.44   | 1.53   | 0.15  | 8703  | 0.0038888 | K    |
| Si               | 4.19   | 2.52   | 0.17  | 15645 | 0.0078256 | K    |
| Cr               | 5.77   | 1.88   | 0.52  | 9443  | 0.0125608 | K    |
| Pb               | 17.10  | 1.40   | 0.74  | 28101 | 0.0321027 | M    |
| Total            | 100.00 | 100.00 |       |       |           |      |

**Figure S2.** Point 005 of analysis (painting layer in the Figure 13) with the chemical elements found. Magnification 1600x

006

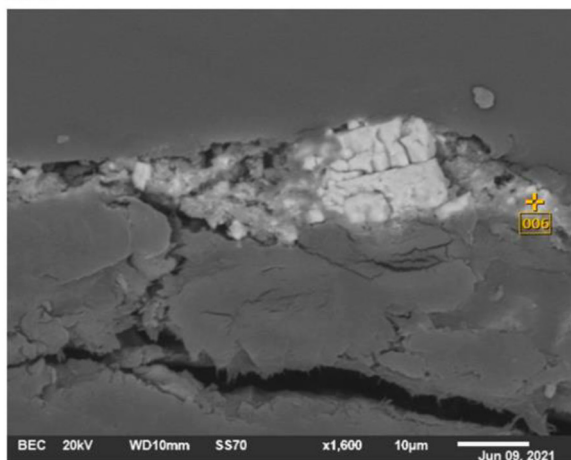

Volt : 20.00 kV  
Mag. : x 1,600  
Date : 2021/06/09  
Pixel : 640 x 480

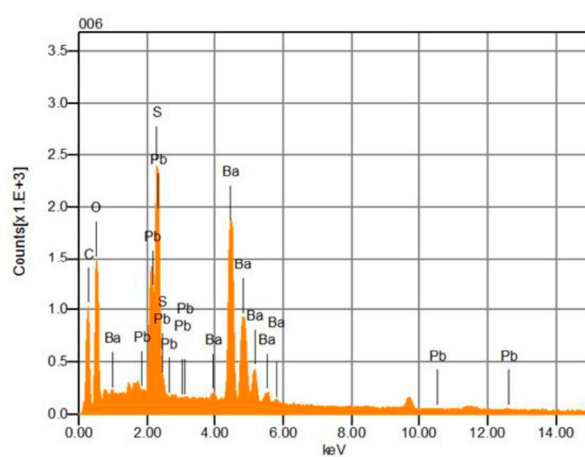

Acquisition Condition  
Instrument : 6010LA  
Volt : 20.00 kV  
Current : ---  
Process Time : T4  
Live time : 60.00 sec.  
Real Time : 63.74 sec.  
DeadTime : 5.00 %  
Count Rate : 3756.00 CPS

| Chemical formula | ms%    | mol%   | Sigma | Net    | K ratio   | Line |
|------------------|--------|--------|-------|--------|-----------|------|
| C                | 26.17  | 59.35  | 0.12  | 23638  | 0.0096907 | K    |
| O                | 14.75  | 25.10  | 0.16  | 33494  | 0.0466328 | K    |
| S                | 7.02   | 5.96   | 0.08  | 78976  | 0.0476704 | K    |
| Ba               | 41.05  | 8.14   | 0.42  | 191828 | 0.2896693 | L    |
| Pb               | 11.01  | 1.45   | 0.41  | 54487  | 0.0622465 | M    |
| Total            | 100.00 | 100.00 |       |        |           |      |

**Figure S3.** Point 006 of analysis (painting layer in the Figure 13) with the chemical elements found. Magnification 1600x

002

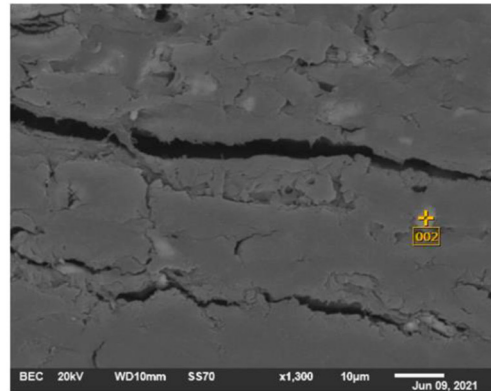

Volt : 20.00 kV  
Mag. : x 1,300  
Date : 2021/06/09  
Pixel : 640 x 480

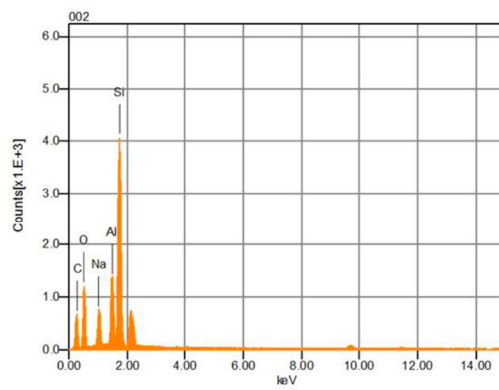

Acquisition Condition  
Instrument : 6010LA  
Volt : 20.00 kV  
Current : ---  
Process Time : T4  
Live time : 40.38 sec.  
Real Time : 42.21 sec.  
DeadTime : 4.00 %  
Count Rate : 2898.00 CPS

| Chemical formula | ms%    | mol%   | Sigma | Net    | K ratio   | Line |
|------------------|--------|--------|-------|--------|-----------|------|
| C                | 42.83  | 55.55  | 0.35  | 17269  | 0.0105192 | K    |
| O                | 28.79  | 28.04  | 0.44  | 29937  | 0.0619335 | K    |
| Na               | 4.49   | 3.05   | 0.19  | 22015  | 0.0242564 | K    |
| Al               | 5.20   | 3.00   | 0.14  | 44373  | 0.0294618 | K    |
| Si               | 18.68  | 10.36  | 0.16  | 156111 | 0.1160255 | K    |
| Total            | 100.00 | 100.00 |       |        |           |      |

**Figure S4.** Point 002 of analysis (internal area of the section in the proximity of a crack, in the Figure 12C) with the chemical elements found. Magnification 1300x

003

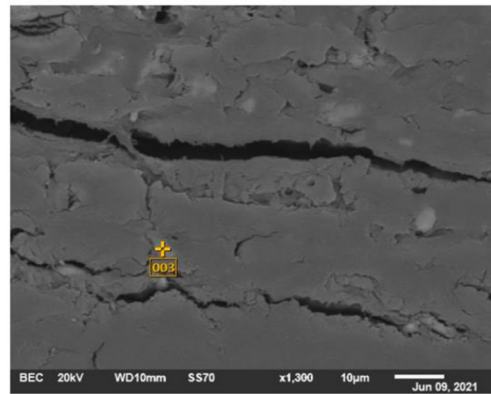

Volt : 20.00 kV  
Mag. : x 1,300  
Date : 2021/06/09  
Pixel : 640 x 480

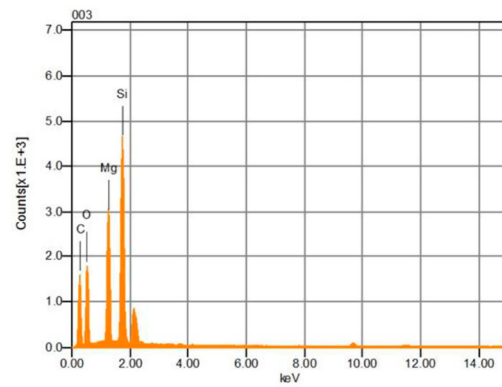

Acquisition Condition  
Instrument : 6010LA  
Volt : 20.00 kV  
Current : ---  
Process Time : T4  
Live time : 48.32 sec.  
Real Time : 50.71 sec.  
DeadTime : 5.00 %  
Count Rate : 3216.00 CPS

| Chemical formula | ms%    | mol%   | Sigma | Net    | K ratio   | Line |
|------------------|--------|--------|-------|--------|-----------|------|
| C                | 48.40  | 60.13  | 0.22  | 38774  | 0.0197381 | K    |
| O                | 29.15  | 27.19  | 0.37  | 45176  | 0.0781010 | K    |
| Mg               | 9.06   | 5.56   | 0.12  | 102881 | 0.0581889 | K    |
| Si               | 13.39  | 7.11   | 0.13  | 175012 | 0.1086993 | K    |
| Total            | 100.00 | 100.00 |       |        |           |      |

**Figure S5.** Point 003 of analysis (internal area of the section in the proximity of a crack, in the Figure 12C) with the chemical elements found. Magnification 1300x

004

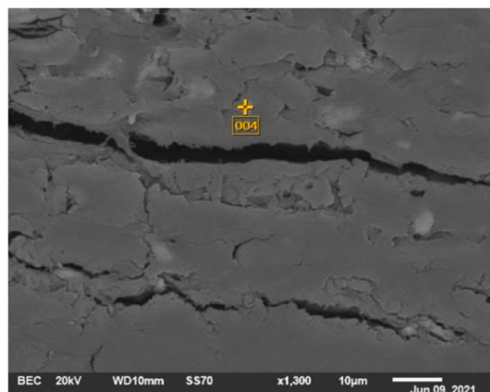

Volt : 20.00 kV  
Mag. : x 1,300  
Date : 2021/06/09  
Pixel : 640 x 480

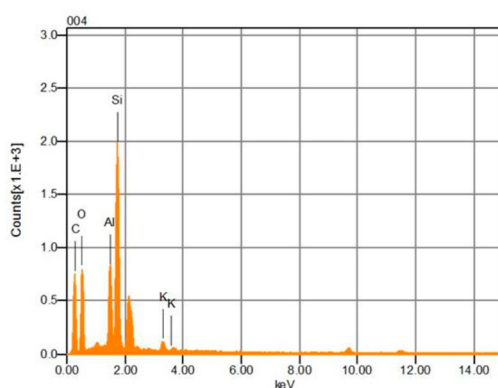

Acquisition Condition  
Instrument : 6010LA  
Volt : 20.00 kV  
Current : ---  
Process Time : T4  
Live time : 31.41 sec.  
Real Time : 32.55 sec.  
DeadTime : 4.00 %  
Count Rate : 2300.00 CPS

| Chemical formula | ms%    | mol%   | Sigma | Net   | K ratio   | Line |
|------------------|--------|--------|-------|-------|-----------|------|
| C                | 49.52  | 60.81  | 0.20  | 18644 | 0.0146005 | K    |
| O                | 32.11  | 29.60  | 0.39  | 20480 | 0.0544676 | K    |
| Al               | 4.32   | 2.36   | 0.11  | 25232 | 0.0215372 | K    |
| Si               | 13.04  | 6.85   | 0.13  | 75119 | 0.0717742 | K    |
| K                | 1.00   | 0.38   | 0.19  | 4558  | 0.0067384 | K    |
| Total            | 100.00 | 100.00 |       |       |           |      |

**Figure S6.** Point 004 of analysis (internal area of the section in the proximity of a crack, in the Figure 12C) with the chemical elements found. Magnification 1300x

002

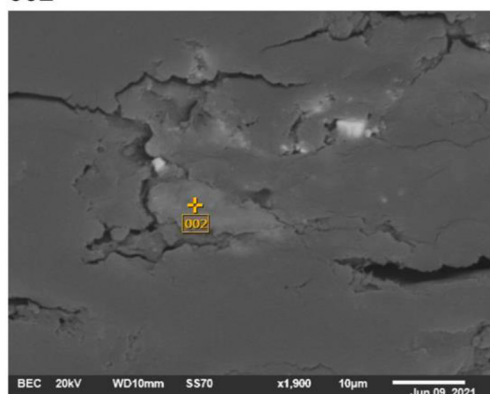

Volt : 20.00 kV  
Mag. : x 1,900  
Date : 2021/06/09  
Pixel : 640 x 480

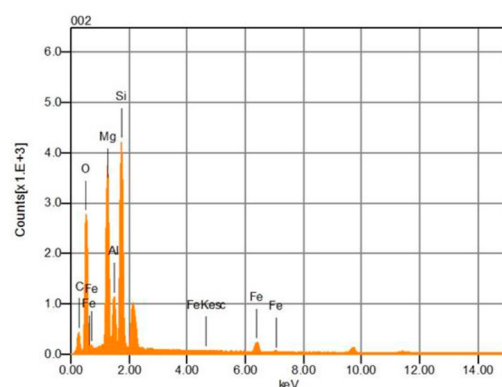

Acquisition Condition  
Instrument : 6010LA  
Volt : 20.00 kV  
Current : ---  
Process Time : T4  
Live time : 60.00 sec.  
Real Time : 62.90 sec.  
DeadTime : 5.00 %  
Count Rate : 3076.00 CPS

| Chemical formula | ms%    | mol%   | Sigma | Net    | K ratio   | Line |
|------------------|--------|--------|-------|--------|-----------|------|
| C                | 22.90  | 33.61  | 0.44  | 9512   | 0.0038996 | K    |
| O                | 37.50  | 41.33  | 0.32  | 71156  | 0.0990689 | K    |
| Mg               | 14.08  | 10.21  | 0.16  | 121225 | 0.0552171 | K    |
| Al               | 3.98   | 2.60   | 0.17  | 34336  | 0.0153427 | K    |
| Si               | 17.49  | 10.98  | 0.19  | 160050 | 0.0800554 | K    |
| Fe               | 4.05   | 1.28   | 0.65  | 13852  | 0.0246995 | K    |
| Total            | 100.00 | 100.00 |       |        |           |      |

**Figure S7.** Point 002 of analysis (internal area of the section, area shown in the Figure 12D) with the chemical elements found.  
Magnification 1900x

003

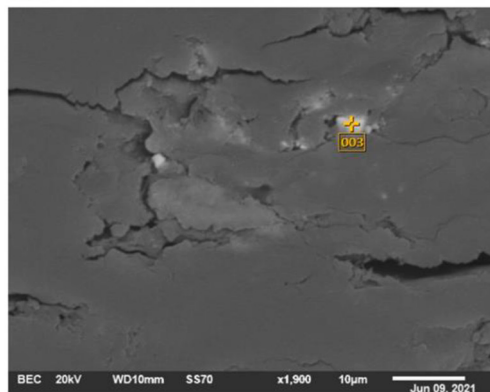

Volt : 20.00 kV  
Mag. : x 1,900  
Date : 2021/06/09  
Pixel : 640 x 480

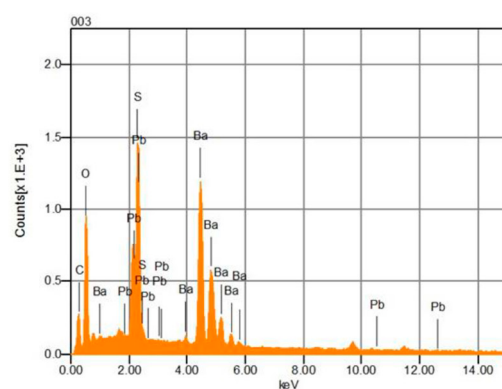

Acquisition Condition  
Instrument : 6010LA  
Volt : 20.00 kV  
Current : ---  
Process Time : T4  
Live time : 32.21 sec.  
Real Time : 34.33 sec.  
DeadTime : 5.00 %  
Count Rate : 3981.00 CPS

| Chemical formula | ms%    | mol%   | Sigma | Net    | K ratio   | Line |
|------------------|--------|--------|-------|--------|-----------|------|
| C                | 13.89  | 40.95  | 0.14  | 5964   | 0.0045543 | K    |
| O                | 15.69  | 34.74  | 0.14  | 22612  | 0.0586434 | K    |
| S                | 8.65   | 9.55   | 0.09  | 49196  | 0.0553151 | K    |
| Ba               | 48.36  | 12.47  | 0.45  | 116904 | 0.3288362 | L    |
| Pb               | 13.41  | 2.29   | 0.45  | 33567  | 0.0714327 | M    |
| Total            | 100.00 | 100.00 |       |        |           |      |

**Figure S8.** Point 003 of analysis (internal area of the section, area shown in the Figure 12D) with the chemical elements found.  
Magnification 1900x
